# Supplementary material
Source: PubMed Central journal article supplement (PMC10427942)
Supplement: jama-e2312357-s003.pdf [file jama-e2312357-s003.pdf]

## Supplemental Online Content

Crowther CA, Ashwood P, Middleton PF, McPhee A, Tran T, Harding JE; MAGENTA Study Group. Prenatal intravenous magnesium at 30-34 weeks' gestation and neurodevelopmental outcomes in offspring: the MAGENTA randomized clinical trial. *JAMA*. Published August 15, 2023. doi:10.1001/jama.2023.12357

**eTable 1.** Baseline participant and pregnancy characteristics: the analysis cohort versus the whole eligible cohort

**eTable 2.** Child Behaviour Check List scores at two years corrected age (secondary childhood outcome)

**eTable 3.** Body size at two years corrected age (secondary childhood outcome)

**eTable 4.** Blood Pressure at two years corrected age (secondary childhood outcome)

**eTable 5.** Infant weight, length and head circumference at birth and at discharge after birth

### **eReferences**

This supplemental material has been provided by the authors to give readers additional information about their work.

**eTable 1.** Baseline participant and pregnancy characteristics: the analysis cohort versus the whole eligible cohort

| <b>Participants</b>                                      | <b>Analysis cohort<br/>n = 1389</b> | <b>Whole cohort<br/>n = 1433</b> |
|----------------------------------------------------------|-------------------------------------|----------------------------------|
| Age (years), mean (SD)                                   | 30.6 (6.5)                          | 30.6 (6.6)                       |
| Parity, No. (%)                                          |                                     |                                  |
| 0                                                        | 722 (52.0)                          | 738 (51.5)                       |
| ≥ 1                                                      | 667 (48.0)                          | 695 (48.5)                       |
| Ethnicity, No. (%) <sup>a</sup>                          |                                     |                                  |
| European                                                 | 945 (68.0)                          | 966 (67.4)                       |
| Asian                                                    | 231 (16.6)                          | 237 (16.5)                       |
| Aboriginal or Torres Strait Islanders                    | 36 (2.6)                            | 46 (3.2)                         |
| Pacific                                                  | 56 (4.0)                            | 61 (4.3)                         |
| Māori                                                    | 81 (5.8)                            | 82 (5.7)                         |
| Other                                                    | 40 (2.9)                            | 41 (2.9)                         |
| Body mass index (kg/m <sup>2</sup> ), median (IQR)       | 25.2 (22.2-29.9)                    | 25.2 (22.2-30.1)                 |
| Gestational age at entry (weeks), mean (SD)              | 32.1 (1.1)                          | 32.1 (1.1)                       |
| 30 to < 32, No. (%)                                      | 612 (44.1)                          | 631 (44.0)                       |
| 32 to < 34, No. (%)                                      | 777 (55.9)                          | 802 (56.0)                       |
| Socioeconomic status, No. (%) <sup>b</sup>               |                                     |                                  |
| Most disadvantaged                                       | 359 (25.8)                          | 377 (26.3)                       |
| Disadvantaged                                            | 214 (15.4)                          | 224 (15.6)                       |
| Middle                                                   | 302 (21.7)                          | 308 (21.5)                       |
| Advantaged                                               | 259 (18.6)                          | 263 (18.4)                       |
| Most advantaged                                          | 255 (18.4)                          | 261 (18.2)                       |
| Female infant, No. (%) <sup>c</sup>                      | 712 (43.6)                          | 734 (43.7)                       |
| Male infant, No. (%) <sup>c</sup>                        | 921 (56.4)                          | 945 (56.3)                       |
| Twin pregnancy, No. (%)                                  | 248 (17.9)                          | 250 (17.4)                       |
| Previous preterm birth (<37 weeks gestation), No. (%)    | 264 (39.6)                          | 277 (39.9)                       |
| Previous perinatal death (≥ 20 weeks gestation), No. (%) | 58 (8.7)                            | 61 (8.8)                         |
| Main reasons at risk for preterm birth                   |                                     |                                  |
| Preterm labor, No. (%)                                   | 379 (27.3)                          | 389 (27.1)                       |
| Preterm prelabor rupture of membranes, No. (%)           | 377 (27.1)                          | 389 (27.1)                       |
| Fetal compromise, No. (%)                                | 247 (17.8)                          | 258 (18.0)                       |
| Pre-eclampsia, No. (%)                                   | 144 (10.4)                          | 146 (10.2)                       |
| Antepartum hemorrhage, No. (%)                           | 132 (9.5)                           | 139 (9.7)                        |
| Other, No. (%)                                           | 110 (7.9)                           | 112 (7.8)                        |

Abbreviations: SD, standard deviation; IQR, interquartile range.

<sup>a</sup> Ethnicity as reported by the participant at study entry.

<sup>b</sup> Derived from Australian socio-economic index for areas (SEIFA), Australia 2011<sup>1</sup> and New Zealand Socioeconomic Deprivation Profile (NZDep)<sup>2</sup>.

<sup>c</sup> Calculated amongst infants.

**eTable 2.** Child Behaviour Check List scores at two years corrected age (secondary childhood outcome)

| Outcome                                                                                   | Magnesium sulfate         | Placebo                   | MD/RD (95% CI)        | RR (95% CI)         | Adjusted <sup>a</sup> MD/RR (95% CI) | Adjusted <sup>a</sup> P value |
|-------------------------------------------------------------------------------------------|---------------------------|---------------------------|-----------------------|---------------------|--------------------------------------|-------------------------------|
| Child behaviour check list scores, median (IQR) [n] <sup>b</sup>                          |                           |                           |                       |                     |                                      |                               |
| Anxious                                                                                   | 3.0 (1.0, 5.0) [n=402]    | 3.0 (1.0, 5.0) [n=391]    | 0.37 (-0.06 to 0.80)  |                     | 0.39 (-0.02 to 0.81)                 | .06                           |
| Withdrawn                                                                                 | 2.0 (1.0, 4.0) [n=402]    | 2.0 (0.0, 3.0) [n=389]    | 0.50 (0.07 to 0.94)   |                     | 0.52 (0.08 to 0.95)                  | .02                           |
| Sleeping                                                                                  | 2.0 (0.5, 4.0) [n=404]    | 2.0 (0.0, 4.0) [n=391]    | 0.21 (-0.17 to 0.58)  |                     | 0.23 (-0.14 to 0.61)                 | .22                           |
| Somatic                                                                                   | 2.0 (2.0, 3.0) [n=398]    | 2.0 (0.0, 3.0) [n=387]    | 0.16 (-0.16 to 0.49)  |                     | 0.18 (-0.14 to 0.51)                 | .26                           |
| Aggressive                                                                                | 7.0 (3.0, 10.0) [n=400]   | 6.0 (3.0, 9.0) [n=386]    | 0.83 (0.05 to 1.61)   |                     | 0.86 (0.09 to 1.62)                  | .03                           |
| Destructive                                                                               | 4.0 (2.0, 6.0) [406]      | 3.0 (2.0, 6.0) [390]      | 0.30 (-0.14 to 0.74)  |                     | 0.30 (-0.13 to 0.74)                 | .17                           |
| Other                                                                                     | 6.0 (3.0, 11.0) [n=389]   | 6.0 (3.0, 9.0) [n=385]    | 1.02 (0.23 to 1.81)   |                     | 1.03 (0.27 to 1.80)                  | .01                           |
| Total                                                                                     | 27.0 (15.0, 42.0) [n=389] | 25.0 (15.0, 37.0) [n=379] | 3.43 (0.51 to 6.36)   |                     | 3.61 (0.75 to 6.47)                  | .01                           |
| Child behaviour check list scores within clinical range (> 97.5 <sup>th</sup> percentile) |                           |                           |                       |                     |                                      |                               |
| Anxiety <sup>c</sup>                                                                      | 33/402 (8.2%)             | 15/391 (3.8%)             | 4.37 (1.08 to 7.66)   | 2.14 (1.18 to 3.88) | 2.14 (1.18 to 3.87)                  | .01                           |
| Withdrawal                                                                                | 76/402 (19%)              | 50/389 (13%)              | 6.05 (0.98 to 11.1)   | 1.47 (1.06 to 2.04) | 1.47 (1.06 to 2.03)                  | .02                           |
| Sleeping problem <sup>d</sup>                                                             | 21/404 (5.2%)             | 8/391 (2.1%)              | 3.15 (0.57 to 5.73)   | 2.54 (1.14 to 5.67) | 2.53 (1.14 to 5.62)                  | .02                           |
| Somatic problem <sup>c</sup>                                                              | 25/398 (6.3%)             | 24/387 (6.2%)             | 0.08 (-3.30 to 3.46)  | 1.01 (0.59 to 1.74) | 1.05 (0.61 to 1.80)                  | .87                           |
| Aggressive behaviour                                                                      | 9/400 (2.3%)              | 2/386 (0.5%)              | 1.73 (0.11 to 3.35)   | N/E                 | N/E                                  | .06 <sup>e</sup>              |
| Destructive behaviour                                                                     | 1/406 (0.3%)              | 1/390 (0.3%)              | -0.01 (-0.71 to 0.69) | N/E                 | N/E                                  | >.99 <sup>e</sup>             |
| Other                                                                                     | 8/389 (2.0%)              | 1/385 (0.3%)              | 1.75 (0.28 to 3.22)   | N/E                 | N/E                                  | .04 <sup>e</sup>              |
| Total <sup>d</sup>                                                                        | 40/389 (10%)              | 24/379 (6.3%)             | 3.95 (0.06 to 7.84)   | 1.62 (1.00 to 2.64) | 1.66 (1.03 to 2.68)                  | .04                           |

The Child Behaviour Checklist is used to detect behavioural and emotional problems in children, with higher scores indicating more behaviour problems.<sup>3</sup>

Abbreviations: MD: mean difference; RD: risk difference in percent; RR: relative risk; IQR: interquartile range; NE: Not estimable.

Values are number (%) and treatment effects are relative risks (95% CI), unless otherwise indicated. Analysis accounted for clustering effect within participant.

<sup>a</sup>: adjusted for hospital, gestational age at entry, plurality, baby sex, language spoken at home and socioeconomic status.

<sup>b</sup>: values are median (IQR) [number], and treatment effects are mean difference (95% CI).

<sup>c</sup>: adjusted for gestational age at entry, plurality, baby sex, and socioeconomic status.

<sup>d</sup>: adjusted for gestational age at entry, plurality, baby sex.

<sup>e</sup>: P value for Fisher's exact test.

**eTable 3.** Body size at two years corrected age (secondary childhood outcome)

| Outcomes                                                 | Magnesium sulfate    | Placebo              | MD/RD (95% CI)        | Adjusted <sup>a</sup> MD/RR (95% CI) | Adjusted <sup>a</sup> P value |
|----------------------------------------------------------|----------------------|----------------------|-----------------------|--------------------------------------|-------------------------------|
| Weight                                                   |                      |                      |                       |                                      |                               |
| Weight (kg), mean (SD) [n] <sup>b</sup>                  | 12.9 (2.1) [n=668]   | 12.9 (2.0) [n=662]   | 0.01 (-0.23 to 0.25)  | 0.04 (-0.18 to 0.27)                 | .71                           |
| Weight z-score, mean (SD) [n] <sup>b c</sup>             | 0.31 (1.17) [n=668]  | 0.28 (1.14) [n=662]  | 0.03 (-0.10 to 0.16)  | 0.04 (-0.09 to 0.17)                 | .54                           |
| Height                                                   |                      |                      |                       |                                      |                               |
| Height (cm), mean (SD) [n] <sup>b</sup>                  | 88.2 (5.1) [n=658]   | 88.4 (5.1) [n=647]   | -0.09 (-0.69 to 0.51) | -0.08 (-0.66 to 0.49)                | .77                           |
| Height z-score, mean (SD) [n] <sup>b c</sup>             | -0.08 (1.27) [n=658] | -0.13 (1.17) [n=647] | 0.05 (-0.10 to 0.19)  | 0.03 (-0.11 to 0.17)                 | .66                           |
| Head circumference                                       |                      |                      |                       |                                      |                               |
| Head circumference (cm), mean (SD) [n] <sup>b</sup>      | 49.0 (1.9) [n=636]   | 49.0 (1.9) [n=629]   | -0.06 (-0.28 to 0.16) | -0.01 (-0.22 to 0.20)                | .92                           |
| Head circumference z-score, mean (SD) [n] <sup>b c</sup> | 0.68 (1.25) [n=636]  | 0.67 (1.28) [n=629]  | 0.00 (-0.15 to 0.15)  | 0.02 (-0.13 to 0.17)                 | .81                           |

Abbreviations: MD: mean difference; RD: risk difference in percent; RR: relative risk; NE: Not estimable.

Values are number (%) and treatment effects are relative risks (95% CI), unless otherwise indicated. Analysis accounted for clustering effect within participant.

<sup>a</sup>: adjusted for hospital, gestational age at entry, plurality, baby sex, language spoken at home and socioeconomic status.

<sup>b</sup>: values are mean (SD), and treatment effects are mean difference (95% CI)

<sup>c</sup>: z-scores estimated using the UK-WHO growth reference.<sup>4</sup>

**eTable 4.** Blood pressure at two years corrected age (secondary childhood outcome)

| Outcome                                            | Magnesium sulfate     | Placebo               | MD/RD (95% CI)        | RR (95% CI)         | Adjusted <sup>a</sup> MD/RR (95% CI) | Adjusted <sup>a</sup> P value |
|----------------------------------------------------|-----------------------|-----------------------|-----------------------|---------------------|--------------------------------------|-------------------------------|
| Systolic blood pressure                            |                       |                       |                       |                     |                                      |                               |
| Systolic BP (mmHg), mean (SD) [n] <sup>b</sup>     | 97.46 (11.07) [n=340] | 97.40 (9.96) [n=339]  | 0.08 (-1.54 to 1.71)  |                     | -0.11 (-1.69 to 1.46)                | .89                           |
| Systolic BP z score, mean (SD) [n] <sup>b c</sup>  | 0.81 (1.06) [n=340]   | 0.81 (0.96) [n=339]   | -0.00 (-0.16 to 0.15) |                     | -0.02 (-0.18 to 0.13)                | .77                           |
| Systolic hypertension, No. (%) <sup>d</sup>        | 76/340 (22%)          | 75/339 (22%)          | 0.22 (-6.16 to 6.61)  | 1.01 (0.76 to 1.35) | 1.00 (0.75 to 1.33)                  | 1.00                          |
| Diastolic blood pressure                           |                       |                       |                       |                     |                                      |                               |
| Diastolic BP (mmHg), mean (SD) [n] <sup>b</sup>    | 57.92 (10.19) [n=338] | 58.85 (10.02) [n=336] | -0.60 (-2.18 to 0.99) |                     | -0.72 (-2.15 to 0.72)                | .33                           |
| Diastolic BP z score, mean (SD) [n] <sup>b c</sup> | 1.22 (0.95) [n=338]   | 1.30 (0.89) [n=336]   | -0.06 (-0.20 to 0.09) |                     | -0.06 (-0.19 to 0.07)                | .39                           |
| Diastolic hypertension, No. (%) <sup>d</sup>       | 123/338 (36%)         | 124/336 (37%)         | 0.14 (-7.36 to 7.65)  | 1.00 (0.82 to 1.23) | 1.03 (0.85 to 1.24)                  | .77                           |
| Hypertension, No. (%) <sup>d</sup>                 | 148/338 (44%)         | 150/336 (45%)         | -0.55 (-8.21 to 7.11) | 0.99 (0.83 to 1.17) | 0.99 (0.84 to 1.17)                  | .90                           |

Abbreviations: MD: mean difference; RD: risk difference in percent; RR: relative risk.

Values are number (%) and treatment effects are relative risks (95% CI), unless otherwise indicated. Analysis accounted for clustering effect within participant.

<sup>a</sup>: adjusted for hospital, gestational age at entry, plurality, baby sex, language spoken at home and socioeconomic status.

<sup>b</sup>: values are mean (SD) [number], and treatment effects are mean difference (95% CI).

<sup>c</sup>: score estimated using blood pressure reference.<sup>5</sup>

<sup>d</sup>: hypertension defined as z-score of systolic blood pressure > 95th percentile using blood pressure nomograms.<sup>5</sup>

**eTable 5.** Infant weight, length and head circumference at birth and at discharge after birth

| Outcome                                        | Magnesium sulfate | Placebo      | MD/RD (95% CI)           | Adjusted <sup>a</sup> MD/RR (95% CI) | Adjusted <sup>a</sup> P value |
|------------------------------------------------|-------------------|--------------|--------------------------|--------------------------------------|-------------------------------|
| Body size at birth, mean (SD) <sup>b</sup>     |                   |              |                          |                                      |                               |
| Weight (g) (858/821)                           | 1797 (464)        | 1774 (467)   | 22.16 (-25.09 to 69.40)  | 28.92 (-12.34 to 70.18)              | .17                           |
| Length (cm) (791/768)                          | 42.4 (3.4)        | 42.1 (3.4)   | 0.28 (-0.08 to 0.63)     | 0.32 (0.01 to 0.63)                  | .045                          |
| Head circumference (cm) (837/805)              | 29.7 (2.1)        | 29.6 (2.0)   | 0.07 (-0.14 to 0.28)     | 0.09 (-0.10 to 0.28)                 | .34                           |
| Birth z-scores, mean (SD) <sup>b,c</sup>       |                   |              |                          |                                      |                               |
| Weight                                         | 0.10 (1.11)       | 0.07 (1.14)  | 0.02 (-0.09 to 0.13)     | 0.03 (-0.08 to 0.14)                 | .55                           |
| Length                                         | -0.07 (1.15)      | -0.13 (1.13) | 0.06 (-0.06 to 0.18)     | 0.07 (-0.04 to 0.18)                 | .24                           |
| Head circumference                             | -0.11 (1.13)      | -0.10 (1.09) | -0.00 (-0.12 to 0.11)    | -0.00 (-0.11 to 0.11)                | .98                           |
| Body size at discharge, mean (SD) <sup>b</sup> |                   |              |                          |                                      |                               |
| Weight (g) (849/816)                           | 2551 (473)        | 2576 (511)   | -20.90 (-71.00 to 29.21) | -11.88 (-60.13 to 36.38)             | .63                           |
| Length (cm) (751/734)                          | 46.2 (3.6)        | 46.2 (3.6)   | -0.07 (-0.46 to 0.31)    | -0.00 (-0.36 to 0.35)                | .98                           |
| Head circumference (cm) (817/775)              | 33.2 (9.1)        | 32.9 (2.1)   | 0.34 (-0.31 to 1.00)     | 0.29 (-0.24 to 0.83)                 | .29                           |
| Discharge z-scores, mean (SD) <sup>b,c</sup>   |                   |              |                          |                                      |                               |
| Weight                                         | -0.98 (1.02)      | -1.03 (1.06) | 0.05 (-0.05 to 0.16)     | 0.07 (-0.03 to 0.17)                 | .19                           |
| Length                                         | -0.90 (1.57)      | -0.92 (1.62) | -0.01 (-0.18 to 0.17)    | 0.04 (-0.13 to 0.20)                 | .67                           |
| Head circumference                             | -0.06 (6.19)      | -0.36 (1.38) | 0.30 (-0.14 to 0.74)     | 0.28 (-0.08 to 0.64)                 | .13                           |

Abbreviations: MD: mean difference; RD: risk difference in percent; RR: relative risk; NE: Not estimable.

Values are mean (standard deviation) and treatment effects are relative risks (95% CI), unless otherwise indicated. Analysis accounted for clustering effect within participant.

<sup>a</sup>: adjusted for hospital, gestational age at entry and plurality.

<sup>b</sup>: values are mean (standard deviation), and treatment effects are differences in means (95% CI).

<sup>c</sup>: z-scores estimated using the UK-WHO growth reference.<sup>4</sup>

## eReferences

1. Australian Bureau of Statistics. Census of Population and Housing: Socio-Economic Indexes for Areas (SEIFA), Australia, 2016. Canberra: ABS, 2016. (ABS Cat. No. 2033.0.55.001).
2. Atkinson J, Salmond C, Crampton P. NZDep2018 Index of Deprivation, Interim Research Report, December 2019. Wellington: University of Otago; 2019.
3. Achenbach T: Manual for the Child Behaviour Checklist 2/3 1992 Profile. Burlington, VT; 1992.
4. Freeman JV, Cole TJ, Chinn S, Jones PRM, White EM, Preece MA: Cross-sectional stature and weight reference curves for the UK 1990. *Arch Dis Child*. 1995;73(1):17-24.
5. Rosner B, Prineas RJ, Loggie JM, Daniels SR: Blood pressure nomograms for children and adolescents, by height, sex, and age, in the United States. *Journal of Pediatrics*. 1993;123(6):871-886.
