# Supplementary material
Source: PubMed Central journal article supplement (PMC10427942)
Supplement: jama-e2312357-s004.pdf [file jama-e2312357-s004.pdf]

\*First name, last name, and suffix (if applicable) are required and will appear in PubMed.

| <b>*Group Name(s): MAGENTA Study Group</b> |                   |                              |                  |                               |                                          |                                                         |                                                                                            |
|--------------------------------------------|-------------------|------------------------------|------------------|-------------------------------|------------------------------------------|---------------------------------------------------------|--------------------------------------------------------------------------------------------|
| <b>*First Name and Middle Initial(s)</b>   | <b>*Last Name</b> | <b>*Suffix (eg, Jr, III)</b> | Academic Degrees | Institution                   | Location (city, state/province, country) | Role or Contribution, eg, chair, principal investigator | Group (if more than 1 Group listed in the byline) and/or Subgroup (eg, Steering Committee) |
| Jane                                       | Alweiler          |                              | PhD              | Auckland City Hospital        | Auckland, New Zealand                    | Site Research Personnel                                 |                                                                                            |
| Ella                                       | Baker             |                              | Research Midwife | Auckland City Hospital        | Auckland, New Zealand                    | Site Research Personnel                                 |                                                                                            |
| Deb                                        | Eaglen            |                              | RM               | Auckland City Hospital        | Auckland, New Zealand                    | Site Research Personnel                                 |                                                                                            |
| Katie                                      | Groom             |                              | PhD              | Auckland City Hospital        | Auckland, New Zealand                    | Site Research Personnel                                 |                                                                                            |
| Helga                                      | Hauch             |                              | RM               | Auckland City Hospital        | Auckland, New Zealand                    | Site Research Personnel                                 |                                                                                            |
| Laura                                      | Mackay            |                              | MPsych Clinical  | Auckland City Hospital        | Auckland, New Zealand                    | Site Research Personnel                                 |                                                                                            |
| Marisa J.                                  | Pacella           |                              | MD               | Auckland City Hospital        | Auckland, New Zealand                    | Site Research Personnel                                 |                                                                                            |
| Alisha                                     | Preest            |                              | BHSc             | Auckland City Hospital        | Auckland, New Zealand                    | Site Research Personnel                                 |                                                                                            |
| Janice                                     | Taylor            |                              | MA (Hons)        | Auckland City Hospital        | Auckland, New Zealand                    | Site Research Personnel                                 |                                                                                            |
| Katherine                                  | Williamson        |                              | MBBS             | Auckland City Hospital        | Auckland, New Zealand                    | Site Research Personnel                                 |                                                                                            |
| Anna                                       | Tottman           |                              | PhD              | Auckland City Hospital        | Auckland, New Zealand                    | Site Research Personnel                                 |                                                                                            |
| Nicola                                     | Austin            |                              | DM               | Christchurch Women's Hospital | Christchurch, New Zealand                | Site Research Personnel                                 |                                                                                            |
| Brian A.                                   | Darlow            |                              | MD               | Christchurch Women's Hospital | Christchurch, New Zealand                | Site Research Personnel                                 |                                                                                            |
| Bronwyn                                    | Dixon             |                              | MBCbB            | Christchurch Women's Hospital | Christchurch, New Zealand                | Site Research Personnel                                 |                                                                                            |
| Nicola                                     | Ellis             |                              | RN               | Christchurch Women's Hospital | Christchurch, New Zealand                | Site Research Personnel                                 |                                                                                            |

## Supplemental Online Content: Nonauthor Collaborators

\*First name, last name, and suffix (if applicable) are required and will appear in PubMed.

| *First Name and Middle Initial(s) | *Last Name | *Suffix (eg, Jr, III) | Academic Degrees | Institution                   | Location (city, state/province, country) | Role or Contribution, eg, chair, principal investigator | Group (if more than 1 Group listed in the byline) and/or Subgroup (eg, Steering Committee) |
|-----------------------------------|------------|-----------------------|------------------|-------------------------------|------------------------------------------|---------------------------------------------------------|--------------------------------------------------------------------------------------------|
| Patricia                          | Graham     |                       | BN,              | Christchurch Women's Hospital | Christchurch, New Zealand                | Site Research Personnel                                 |                                                                                            |
| Joanna                            | Gullam     |                       | MD               | Christchurch Women's Hospital | Christchurch, New Zealand                | Site Research Personnel                                 |                                                                                            |
| Dianne                            | Leishman   |                       | RM               | Christchurch Women's Hospital | Christchurch, New Zealand                | Site Research Personnel                                 |                                                                                            |
| Michelle M.                       | Van Dyk    |                       | MA               | Christchurch Women's Hospital | Christchurch, New Zealand                | Site Research Personnel                                 |                                                                                            |
| Roland                            | Broadbent  |                       | MB ChB           | Dunedin Hospital              | Dunedin, New Zealand                     | Site Research Personnel                                 |                                                                                            |
| Pauline                           | Dawson     |                       | RM               | Dunedin Hospital              | Dunedin, New Zealand                     | Site Research Personnel                                 |                                                                                            |
| Celia                             | Devenish   |                       | MBBS             | Dunedin Hospital              | Dunedin, New Zealand                     | Site Research Personnel                                 |                                                                                            |
| Janene                            | Douglas    |                       | NZDOT            | Dunedin Hospital              | Dunedin, New Zealand                     | Site Research Personnel                                 |                                                                                            |
| Frances                           | McCaffrey  |                       | BN               | Dunedin Hospital              | Dunedin, New Zealand                     | Site Research Personnel                                 |                                                                                            |
| Robert                            | Carey      |                       | BMBS             | Flinders Medical Centre       | Bedford Park, South Australia, Australia | Site Research Personnel                                 |                                                                                            |
| Peter                             | Marshall   |                       | MBBS             | Flinders Medical Centre       | Bedford Park, South Australia, Australia | Site Research Personnel                                 |                                                                                            |
| Scott                             | Morris     |                       | PhD              | Flinders Medical Centre       | Bedford Park, South Australia, Australia | Site Research Personnel                                 |                                                                                            |
| Tran                              | Nguyen     |                       | BMBS             | Flinders Medical Centre       | Bedford Park, South Australia, Australia | Site Research Personnel                                 |                                                                                            |
| Kirsten                           | Gaerty     |                       | MBChB            | Hawkes Bay Hospital           | Hastings, New Zealand                    | Site Research Personnel                                 |                                                                                            |
| Oliver                            | Grupp      |                       | MD               | Hawkes Bay Hospital           | Hastings, New Zealand                    | Site Research Personnel                                 |                                                                                            |
| Geoffrey                          | Boddice    |                       | DPsych           | Ipswich Hospital              | Ipswich, Queensland, Australia           | Site Research Personnel                                 |                                                                                            |

## Supplemental Online Content: Nonauthor Collaborators

\*First name, last name, and suffix (if applicable) are required and will appear in PubMed.

| *First Name and Middle Initial(s) | *Last Name  | *Suffix (eg, Jr, III) | Academic Degrees | Institution                               | Location (city, state/province, country) | Role or Contribution, eg, chair, principal investigator | Group (if more than 1 Group listed in the byline) and/or Subgroup (eg, Steering Committee) |
|-----------------------------------|-------------|-----------------------|------------------|-------------------------------------------|------------------------------------------|---------------------------------------------------------|--------------------------------------------------------------------------------------------|
| Ann                               | Green       |                       | RM               | Ipswich Hospital                          | Ipswich, Queensland, Australia           | Site Research Personnel                                 |                                                                                            |
| Kassam                            | Mahomed     |                       | MBChB            | Ipswich Hospital                          | Ipswich, Queensland, Australia           | Site Research Personnel                                 |                                                                                            |
| Laura                             | Turner      |                       | M.Psych Clin     | Ipswich Hospital                          | Ipswich, Queensland, Australia           | Site Research Personnel                                 |                                                                                            |
| Michelle                          | Baldwin     |                       | Admin Diploma    | Launceston General Hospital               | Launceston, Tasmania, Australia          | Site Research Personnel                                 |                                                                                            |
| Amanda                            | Dennis      |                       | MBBS             | Launceston General Hospital               | Launceston, Tasmania, Australia          | Site Research Personnel                                 |                                                                                            |
| Eleanor                           | Fisher      |                       | RM               | Launceston General Hospital               | Launceston, Tasmania, Australia          | Site Research Personnel                                 |                                                                                            |
| Karen                             | Gee         |                       | M Spec Ed        | Launceston General Hospital               | Launceston, Tasmania, Australia          | Site Research Personnel                                 |                                                                                            |
| Michael                           | Gee         |                       | M Spec Ed        | Launceston General Hospital               | Launceston, Tasmania, Australia          | Site Research Personnel                                 |                                                                                            |
| David                             | Strong      |                       | MBBS             | Launceston General Hospital               | Launceston, Tasmania, Australia          | Site Research Personnel                                 |                                                                                            |
| Sharin                            | Asadi       |                       | MD               | Liggins Institute, University of Auckland | Auckland, New Zealand                    | Site Research Personnel                                 |                                                                                            |
| Nataliia                          | Burakevych  |                       | PhD              | Liggins Institute, University of Auckland | Auckland, New Zealand                    | Follow up research officer                              |                                                                                            |
| Rebecca                           | Griffth     |                       | MBChB            | Liggins Institute, University of Auckland | Auckland, New Zealand                    | Follow up research officer                              |                                                                                            |
| Anushika                          | Kendaragama |                       | MD               | Liggins Institute, University of Auckland | Auckland, New Zealand                    | Follow up research officer                              |                                                                                            |
| Olga                              | Ksionda     |                       | PhD              | Liggins Institute, University of Auckland | Auckland, New Zealand                    | Clinical trial co-ordinator                             |                                                                                            |
| Khansaa                           | Kurkchi     |                       | MSc              | Liggins Institute, University of Auckland | Auckland, New Zealand                    | Follow up research officer                              |                                                                                            |
| Claudia                           | Paine       |                       | BA               | Liggins Institute, University of Auckland | Auckland, New Zealand                    | Clinical trial co-ordinator                             |                                                                                            |

## Supplemental Online Content: Nonauthor Collaborators

\*First name, last name, and suffix (if applicable) are required and will appear in PubMed.

| *First Name and Middle Initial(s) | *Last Name | *Suffix (eg, Jr, III) | Academic Degrees | Institution                               | Location (city, state/province, country) | Role or Contribution, eg, chair, principal investigator | Group (if more than 1 Group listed in the byline) and/or Subgroup (eg, Steering Committee) |
|-----------------------------------|------------|-----------------------|------------------|-------------------------------------------|------------------------------------------|---------------------------------------------------------|--------------------------------------------------------------------------------------------|
| Sarah                             | Philipsen  |                       | MSc              | Liggins Institute, University of Auckland | Auckland, New Zealand                    | Clinical trial co-ordinator                             |                                                                                            |
| Jenny                             | Rogers     |                       | MHSc             | Liggins Institute, University of Auckland | Auckland, New Zealand                    | Follow up research manager                              |                                                                                            |
| Debbie                            | Samuel     |                       | BEd              | Liggins Institute, University of Auckland | Auckland, New Zealand                    | Clinical trial co-ordinator                             |                                                                                            |
| Rajesh                            | Shah       |                       | PhD              | Liggins Institute, University of Auckland | Auckland, New Zealand                    | Follow up research officer                              |                                                                                            |
| Nina                              | Slabkevich |                       | DM               | Liggins Institute, University of Auckland | Auckland, New Zealand                    | Follow up research officer                              |                                                                                            |
| Heather                           | Stewart    |                       | RN               | Liggins Institute, University of Auckland | Auckland, New Zealand                    | Follow up research officer                              |                                                                                            |
| Alena                             | Vasilenko  |                       | MD               | Liggins Institute, University of Auckland | Auckland, New Zealand                    | Follow up research officer                              |                                                                                            |
| Katherine                         | Williamson |                       | MBBS             | Liggins Institute, University of Auckland | Auckland, New Zealand                    | Site Research Personnel                                 |                                                                                            |
| Michael                           | Beckman    |                       | PhD              | Mater Mothers' Hospital                   | South Brisbane, Queensland, Australia    | Site Research Personnel                                 |                                                                                            |
| Elize                             | Bolton     |                       | MBBS             | Mater Mothers' Hospital                   | South Brisbane, Queensland, Australia    | Site Research Personnel                                 |                                                                                            |
| Jacqueline                        | Chaplin    |                       | BHHL Nursing     | Mater Mothers' Hospital                   | South Brisbane, Queensland, Australia    | Site Research Personnel                                 |                                                                                            |
| Catherine                         | Cooper     |                       | BA, RM           | Mater Mothers' Hospital                   | South Brisbane, Queensland, Australia    | Site Research Personnel                                 |                                                                                            |
| Jane                              | Fox        |                       | PhD              | Mater Mothers' Hospital                   | South Brisbane, Queensland, Australia    | Site Research Personnel                                 |                                                                                            |

## Supplemental Online Content: Nonauthor Collaborators

\*First name, last name, and suffix (if applicable) are required and will appear in PubMed.

| *First Name and Middle Initial(s) | *Last Name | *Suffix (eg, Jr, III) | Academic Degrees  | Institution             | Location (city, state/province, country) | Role or Contribution, eg, chair, principal investigator | Group (if more than 1 Group listed in the byline) and/or Subgroup (eg, Steering Committee) |
|-----------------------------------|------------|-----------------------|-------------------|-------------------------|------------------------------------------|---------------------------------------------------------|--------------------------------------------------------------------------------------------|
| Peter                             | Gray       |                       | MD                | Mater Mothers' Hospital | South Brisbane, Queensland, Australia    | Site Research Personnel                                 |                                                                                            |
| Glenda                            | Hawley     |                       | PhD               | Mater Mothers' Hospital | South Brisbane, Queensland, Australia    | Site Research Personnel                                 |                                                                                            |
| Julie                             | Hickey     |                       | RN, RM            | Mater Mothers' Hospital | South Brisbane, Queensland, Australia    | Site Research Personnel                                 |                                                                                            |
| Joanne                            | Hoey       |                       | B Nurs, M Mid,    | Mater Mothers' Hospital | South Brisbane, Queensland, Australia    | Site Research Personnel                                 |                                                                                            |
| Elizabeth                         | Hurrión    |                       | MBChB             | Mater Mothers' Hospital | South Brisbane, Queensland, Australia    | Site Research Personnel                                 |                                                                                            |
| Luke                              | Jardine    |                       | MBBS, M Clin Epid | Mater Mothers' Hospital | South Brisbane, Queensland, Australia    | Site Research Personnel                                 |                                                                                            |
| Janet                             | Kan        |                       | MEd               | Mater Mothers' Hospital | South Brisbane, Queensland, Australia    | Site Research Personnel                                 |                                                                                            |
| Lisa                              | Lynn       |                       | M Psych           | Mater Mothers' Hospital | South Brisbane, Queensland, Australia    | Site Research Personnel                                 |                                                                                            |
| Teoni                             | McHale     |                       | MSc, RM, RN       | Mater Mothers' Hospital | South Brisbane, Queensland, Australia    | Site Research Personnel                                 |                                                                                            |
| Dianne                            | Poad       |                       | MBChB             | Mater Mothers' Hospital | South Brisbane, Queensland, Australia    | Site Research Personnel                                 |                                                                                            |

## Supplemental Online Content: Nonauthor Collaborators

\*First name, last name, and suffix (if applicable) are required and will appear in PubMed.

| *First Name and Middle Initial(s) | *Last Name | *Suffix (eg, Jr, III) | Academic Degrees | Institution                                      | Location (city, state/province, country)                        | Role or Contribution, eg, chair, principal investigator | Group (if more than 1 Group listed in the byline) and/or Subgroup (eg, Steering Committee) |
|-----------------------------------|------------|-----------------------|------------------|--------------------------------------------------|-----------------------------------------------------------------|---------------------------------------------------------|--------------------------------------------------------------------------------------------|
| Leith                             | Poulsen    |                       | BSc              | Mater Mothers' Hospital                          | South Brisbane, Queensland, Australia                           | Site Research Personnel                                 |                                                                                            |
| Kym                               | Warhurst   |                       | MBBS             | Mater Mothers' Hospital                          | South Brisbane, Queensland, Australia                           | Site Research Personnel                                 |                                                                                            |
| Caitlin                           | Bice       |                       | CNS              | Mercy Hospital for Women                         | Heidelberg, Victoria, Australia                                 | Site Research Personnel                                 |                                                                                            |
| Noni                              | Davis      |                       | MBBS             | Mercy Hospital for Women, Royal Women's Hospital | Heidelberg, Victoria, Australia, Melbourne, Victoria, Australia | Site Research Personnel                                 |                                                                                            |
| Julanne                           | Duff       |                       | MBBS             | Mercy Hospital for Women                         | Heidelberg, Victoria, Australia                                 | Site Research Personnel                                 |                                                                                            |
| Amanda                            | Jones      |                       | MBBS             | Mercy Hospital for Women                         | Heidelberg, Victoria, Australia                                 | Site Research Personnel                                 |                                                                                            |
| Elaine A.                         | Kelly      |                       | MA               | Mercy Hospital for Women                         | Heidelberg, Victoria, Australia                                 | Site Research Personnel                                 |                                                                                            |
| Emma                              | Magrath    |                       | MBBS             | Mercy Hospital for Women                         | Heidelberg, Victoria, Australia                                 | Site Research Personnel                                 |                                                                                            |
| Dianne                            | Malcolm    |                       | RM               | Mercy Hospital for Women                         | Heidelberg, Victoria, Australia                                 | Site Research Personnel                                 |                                                                                            |
| Kerry-Ann                         | O'Connor   |                       | RN, PG NICU Cert | Mercy Hospital for Women                         | Heidelberg, Victoria, Australia                                 | Site Research Personnel                                 |                                                                                            |
| Gillian                           | Opie       |                       | MBBS             | Mercy Hospital for Women                         | Heidelberg, Victoria, Australia                                 | Site Research Personnel                                 |                                                                                            |
| Anne-Marie                        | Turner     |                       | MBBS             | Mercy Hospital for Women                         | Heidelberg, Victoria, Australia                                 | Site Research Personnel                                 |                                                                                            |
| Susan                             | Walker     |                       | MD               | Mercy Hospital for Women                         | Heidelberg, Victoria, Australia                                 | Site Research Personnel                                 |                                                                                            |
| Amanda                            | Williamson |                       | MA               | Mercy Hospital for Women                         | Heidelberg, Victoria, Australia                                 | Site Research Personnel                                 |                                                                                            |

## Supplemental Online Content: Nonauthor Collaborators

\*First name, last name, and suffix (if applicable) are required and will appear in PubMed.

| *First Name and Middle Initial(s) | *Last Name | *Suffix (eg, Jr, III) | Academic Degrees       | Institution              | Location (city, state/province, country) | Role or Contribution, eg, chair, principal investigator | Group (if more than 1 Group listed in the byline) and/or Subgroup (eg, Steering Committee) |
|-----------------------------------|------------|-----------------------|------------------------|--------------------------|------------------------------------------|---------------------------------------------------------|--------------------------------------------------------------------------------------------|
| Heather                           | Woods      |                       | RN                     | Mercy Hospital for Women | Heidelberg, Victoria, Australia          | Site Research Personnel                                 |                                                                                            |
| David                             | Hou        |                       | MBChB                  | Middlemore Hospital      | Auckland, New Zealand                    | Site Research Personnel                                 |                                                                                            |
| Michella                          | Kippen     |                       | BSc Physio, PGDip PT   | Middlemore Hospital      | Auckland, New Zealand                    | Site Research Personnel                                 |                                                                                            |
| Jen                               | Schroder   |                       | BHSc, PGDip Midwifery  | Middlemore Hospital      | Auckland, New Zealand                    | Site Research Personnel                                 |                                                                                            |
| Avril J.                          | Thesing    |                       | BA, M Dev Psych (Hons) | Middlemore Hospital      | Auckland, New Zealand                    | Site Research Personnel                                 |                                                                                            |
| Sarah                             | Wadsworth  |                       | MBChB                  | Middlemore Hospital      | Auckland, New Zealand                    | Site Research Personnel                                 |                                                                                            |
| Laxmi                             | Camadoo    |                       | MBBS                   | Redcliffe Hospital       | Redcliffe, Queensland, Australia         | Site Research Personnel                                 |                                                                                            |
| Christine                         | Dyer       |                       | MPsych Clinical        | Redcliffe Hospital       | Redcliffe, Queensland, Australia         | Site Research Personnel                                 |                                                                                            |
| Stephanie                         | Jones      |                       | MPsych Clinical        | Redcliffe Hospital       | Redcliffe, Queensland, Australia         | Site Research Personnel                                 |                                                                                            |
| Alka                              | Kothari    |                       | MD                     | Redcliffe Hospital       | Redcliffe, Queensland, Australia         | Site Research Personnel                                 |                                                                                            |

## Supplemental Online Content: Nonauthor Collaborators

\*First name, last name, and suffix (if applicable) are required and will appear in PubMed.

| *First Name and Middle Initial(s) | *Last Name | *Suffix (eg, Jr, III) | Academic Degrees | Institution              | Location (city, state/province, country) | Role or Contribution, eg, chair, principal investigator | Group (if more than 1 Group listed in the byline) and/or Subgroup (eg, Steering Committee) |
|-----------------------------------|------------|-----------------------|------------------|--------------------------|------------------------------------------|---------------------------------------------------------|--------------------------------------------------------------------------------------------|
| Vesna                             | Markovic   |                       | MBBS             | Redcliffe Hospital       | Redcliffe, Queensland, Australia         | Site Research Personnel                                 |                                                                                            |
| Jenny                             | Owens      |                       | RN, RM           | Redcliffe Hospital       | Redcliffe, Queensland, Australia         | Site Research Personnel                                 |                                                                                            |
| Meredith                          | Shallcross |                       | CNM              | Redcliffe Hospital       | Redcliffe, Queensland, Australia         | Site Research Personnel                                 |                                                                                            |
| Karen                             | Butterley  |                       | MN               | Royal Hobart Hospital    | Hobart, Tasmania, Australia              | Site Research Personnel                                 |                                                                                            |
| Caroline                          | Davis      |                       | M. Clin. Psych.  | Royal Hobart Hospital    | Hobart, Tasmania, Australia              | Site Research Personnel                                 |                                                                                            |
| Antonio                           | De Paoli   |                       | MD               | Royal Hobart Hospital    | Hobart, Tasmania, Australia              | Site Research Personnel                                 |                                                                                            |
| Serani                            | Dodson     |                       | RN, RM           | Royal Hobart Hospital    | Hobart, Tasmania, Australia              | Site Research Personnel                                 |                                                                                            |
| Matthew                           | Holmes     |                       | MBBS             | Royal Hobart Hospital    | Hobart, Tasmania, Australia              | Site Research Personnel                                 |                                                                                            |
| Hanumesha                         | Kenchapla  |                       | MBBS             | Royal Hobart Hospital    | Hobart, Tasmania, Australia              | Site Research Personnel                                 |                                                                                            |
| Tammy                             | Matzolic   |                       | RN               | Royal Hobart Hospital    | Hobart, Tasmania, Australia              | Site Research Personnel                                 |                                                                                            |
| Amy                               | McGregor   |                       | MClin Psych      | Royal Hobart Hospital    | Hobart, Tasmania, Australia              | Site Research Personnel                                 |                                                                                            |
| Sajid                             | Patel      |                       | MD               | Royal Hobart Hospital    | Hobart, Tasmania, Australia              | Site Research Personnel                                 |                                                                                            |
| Samja                             | Simic      |                       | NPICU            | Royal Hobart Hospital    | Hobart, Tasmania, Australia              | Site Research Personnel                                 |                                                                                            |
| Vanessa                           | Andrijic   |                       | MPsych           | Royal Hospital for Women | Sydney, New South Wales, Australia       | Site Research Personnel                                 |                                                                                            |



## Supplemental Online Content: Nonauthor Collaborators

\*First name, last name, and suffix (if applicable) are required and will appear in PubMed.

| *First Name and Middle Initial(s) | *Last Name | *Suffix (eg, Jr, III) | Academic Degrees            | Institution                | Location (city, state/province, country) | Role or Contribution, eg, chair, principal investigator | Group (if more than 1 Group listed in the byline) and/or Subgroup (eg, Steering Committee) |
|-----------------------------------|------------|-----------------------|-----------------------------|----------------------------|------------------------------------------|---------------------------------------------------------|--------------------------------------------------------------------------------------------|
| Vikki                             | Biggs      |                       | M.Clin.Psych.               | Royal Hospital for Women   | Sydney, New South Wales, Australia       | Site Research Personnel                                 |                                                                                            |
| Susan                             | Brandrick  |                       | RM                          | Royal Hospital for Women   | Sydney, New South Wales, Australia       | Site Research Personnel                                 |                                                                                            |
| Silvia                            | Goldstein  |                       | MBBS                        | Royal Hospital for Women   | Sydney, New South Wales, Australia       | Site Research Personnel                                 |                                                                                            |
| Anne                              | Lainchbury |                       | RN, M Midwifery             | Royal Hospital for Women   | Sydney, New South Wales, Australia       | Site Research Personnel                                 |                                                                                            |
| Kei                               | Lui        |                       | MD                          | Royal Hospital for Women   | Sydney, New South Wales, Australia       | Site Research Personnel                                 |                                                                                            |
| Sarah                             | Lyons      |                       | MBBS                        | Royal Hospital for Women   | Sydney, New South Wales, Australia       | Site Research Personnel                                 |                                                                                            |
| Antonia                           | Shand      |                       | MBChB                       | Royal Hospital for Women   | Sydney, New South Wales, Australia       | Site Research Personnel                                 |                                                                                            |
| Lee                               | Sutton     |                       | PhD                         | Royal Hospital for Women   | Sydney, New South Wales, Australia       | Site Research Personnel                                 |                                                                                            |
| Lynette                           | Barnes     |                       | RN                          | Royal North Shore Hospital | Sydney, New South Wales, Australia       | Site Research Personnel                                 |                                                                                            |
| Jennifer                          | Bowen      |                       | MD                          | Royal North Shore Hospital | Sydney, New South Wales, Australia       | Site Research Personnel                                 |                                                                                            |
| Lyndsey                           | Harvey     |                       | RN                          | Royal North Shore Hospital | Sydney, New South Wales, Australia       | Site Research Personnel                                 |                                                                                            |
| Claire                            | Jacobs     |                       | BSc, GCert Neonatal Nursing | Royal North Shore Hospital | Sydney, New South Wales, Australia       | Site Research Personnel                                 |                                                                                            |
| Jill                              | Milligan   |                       | RN, RM                      | Royal North Shore Hospital | Sydney, New South Wales, Australia       | Site Research Personnel                                 |                                                                                            |
| Jonathan                          | Morris     |                       | PhD                         | Royal North Shore Hospital | Sydney, New South Wales, Australia       | Site Research Personnel                                 |                                                                                            |

## Supplemental Online Content: Nonauthor Collaborators

\*First name, last name, and suffix (if applicable) are required and will appear in PubMed.

| *First Name and Middle Initial(s) | *Last Name | *Suffix (eg, Jr, III) | Academic Degrees           | Institution                | Location (city, state/province, country) | Role or Contribution, eg, chair, principal investigator | Group (if more than 1 Group listed in the byline) and/or Subgroup (eg, Steering Committee) |
|-----------------------------------|------------|-----------------------|----------------------------|----------------------------|------------------------------------------|---------------------------------------------------------|--------------------------------------------------------------------------------------------|
| Tanya                             | Nippita    |                       | PhD                        | Royal North Shore Hospital | Sydney, New South Wales, Australia       | Site Research Personnel                                 |                                                                                            |
| Rachelle                          | Sau-Harvey |                       | BSc                        | Royal North Shore Hospital | Sydney, New South Wales, Australia       | Site Research Personnel                                 |                                                                                            |
| Amy                               | Sparks     |                       | Clinical Psychologist      | Royal North Shore Hospital | Sydney, New South Wales, Australia       | Site Research Personnel                                 |                                                                                            |
| Anmaree                           | Wegener    |                       | RM                         | Royal North Shore Hospital | Sydney, New South Wales, Australia       | Site Research Personnel                                 |                                                                                            |
| Alice                             | Burnett    |                       | MPsych, PhD                | Royal Women's Hospital     | Melbourne, Victoria, Australia           | Site Research Personnel                                 |                                                                                            |
| Kate                              | Callanan   |                       | RN, RM                     | Royal Women's Hospital     | Melbourne, Victoria, Australia           | Site Research Personnel                                 |                                                                                            |
| Jeanie                            | Cheong     |                       | MD                         | Royal Women's Hospital     | Melbourne, Victoria, Australia           | Site Research Personnel                                 |                                                                                            |
| Cinzia                            | De Luca    |                       | PhD                        | Royal Women's Hospital     | Melbourne, Victoria, Australia           | Site Research Personnel                                 |                                                                                            |
| Lex                               | Doyle      |                       | MD                         | Royal Women's Hospital     | Melbourne, Victoria, Australia           | Site Research Personnel                                 |                                                                                            |
| Jacobus                           | du Plessis |                       | MB. ChB                    | Royal Women's Hospital     | Melbourne, Victoria, Australia           | Site Research Personnel                                 |                                                                                            |
| Julianne                          | Duff       |                       | MBBS                       | Royal Women's Hospital     | Melbourne, Victoria, Australia           | Site Research Personnel                                 |                                                                                            |
| Esther                            | Hutchinson |                       | DPsych Clinical Neuropsych | Royal Women's Hospital     | Melbourne, Victoria, Australia           | Site Research Personnel                                 |                                                                                            |
| Stefan C.                         | Kane       |                       | MBBS                       | Royal Women's Hospital     | Melbourne, Victoria, Australia           | Site Research Personnel                                 |                                                                                            |
| Elaine                            | Kelly      |                       | B NeuroPsych               | Royal Women's Hospital     | Melbourne, Victoria, Australia           | Site Research Personnel                                 |                                                                                            |

## Supplemental Online Content: Nonauthor Collaborators

\*First name, last name, and suffix (if applicable) are required and will appear in PubMed.

| *First Name and Middle Initial(s) | *Last Name  | *Suffix (eg, Jr, III) | Academic Degrees | Institution            | Location (city, state/province, country) | Role or Contribution, eg, chair, principal investigator | Group (if more than 1 Group listed in the byline) and/or Subgroup (eg, Steering Committee) |
|-----------------------------------|-------------|-----------------------|------------------|------------------------|------------------------------------------|---------------------------------------------------------|--------------------------------------------------------------------------------------------|
| Louise                            | Kornman     |                       | PhD              | Royal Women's Hospital | Melbourne, Victoria, Australia           | Site Research Personnel                                 |                                                                                            |
| Dianna                            | Maxwell     |                       | RM               | Royal Women's Hospital | Melbourne, Victoria, Australia           | Site Research Personnel                                 |                                                                                            |
| Marion                            | McDonald    |                       | RN               | Royal Women's Hospital | Melbourne, Victoria, Australia           | Site Research Personnel                                 |                                                                                            |
| Megan                             | Poth        |                       | RM               | Royal Women's Hospital | Melbourne, Victoria, Australia           | Site Research Personnel                                 |                                                                                            |
| James C.                          | Arcus       |                       | MBChB            | Southland Hospital     | Invercargill, New Zealand                | Site Research Personnel                                 |                                                                                            |
| Marie                             | Cruickshank |                       | Bphty            | Southland Hospital     | Invercargill, New Zealand                | Site Research Personnel                                 |                                                                                            |
| Bridget                           | Devoy       |                       | B Occ Therapy    | Southland Hospital     | Invercargill, New Zealand                | Site Research Personnel                                 |                                                                                            |
| Melanie J.                        | Fanning     |                       | B Occ Therapy    | Southland Hospital     | Invercargill, New Zealand                | Site Research Personnel                                 |                                                                                            |
| Kylee                             | Henriksen   |                       | B Occ Therapy    | Southland Hospital     | Invercargill, New Zealand                | Site Research Personnel                                 |                                                                                            |
| Fiona                             | Morse       |                       | BHSc             | Southland Hospital     | Invercargill, New Zealand                | Site Research Personnel                                 |                                                                                            |
| Amber                             | Schiller    |                       | Physiotherapist  | Southland Hospital     | Invercargill, New Zealand                | Site Research Personnel                                 |                                                                                            |
| Paul A.                           | Tomlinson   |                       | MD               | Southland Hospital     | Invercargill, New Zealand                | Site Research Personnel                                 |                                                                                            |
| Greg                              | Davis       |                       | MD               | St George Hospital     | Sydney, New South Wales, Australia       | Site Research Personnel                                 |                                                                                            |
| Ana                               | Dosen       |                       | MBBS             | St George Hospital     | Sydney, New South Wales, Australia       | Site Research Personnel                                 |                                                                                            |
| Lynne                             | Roberts     |                       | MMid, MHSc       | St George Hospital     | Sydney, New South Wales, Australia       | Site Research Personnel                                 |                                                                                            |
| Clare                             | Rowe        |                       | Psychologist     | St George Hospital     | Sydney, New South Wales, Australia       | Site Research Personnel                                 |                                                                                            |

## Supplemental Online Content: Nonauthor Collaborators

\*First name, last name, and suffix (if applicable) are required and will appear in PubMed.

| *First Name and Middle Initial(s) | *Last Name | *Suffix (eg, Jr, III) | Academic Degrees        | Institution                        | Location (city, state/province, country) | Role or Contribution, eg, chair, principal investigator | Group (if more than 1 Group listed in the byline) and/or Subgroup (eg, Steering Committee) |
|-----------------------------------|------------|-----------------------|-------------------------|------------------------------------|------------------------------------------|---------------------------------------------------------|--------------------------------------------------------------------------------------------|
| Laxmi                             | Camadoo    |                       | MBBS                    | Sunshine Coast University Hospital | Birtinya, Queensland, Australia          | Site Research Personnel                                 |                                                                                            |
| Julie                             | Creen      |                       | B Occ Thy               | Sunshine Coast University Hospital | Birtinya, Queensland, Australia          | Site Research Personnel                                 |                                                                                            |
| Kellee                            | Gee        |                       | PGDip Psych             | Sunshine Coast University Hospital | Birtinya, Queensland, Australia          | Site Research Personnel                                 |                                                                                            |
| Tom                               | Hurley     |                       | MBBS                    | Sunshine Coast University Hospital | Birtinya, Queensland, Australia          | Site Research Personnel                                 |                                                                                            |
| Linda                             | Pallett    |                       | BN, M Midwifery         | Sunshine Coast University Hospital | Birtinya, Queensland, Australia          | Site Research Personnel                                 |                                                                                            |
| Carmel                            | Smitheram  |                       | RM                      | Sunshine Coast University Hospital | Birtinya, Queensland, Australia          | Site Research Personnel                                 |                                                                                            |
| Annette                           | Thompson   |                       | RN, RM                  | Sunshine Coast University Hospital | Birtinya, Queensland, Australia          | Site Research Personnel                                 |                                                                                            |
| Edward                            | Weaver     |                       | MBBS                    | Sunshine Coast University Hospital | Birtinya, Queensland, Australia          | Site Research Personnel                                 |                                                                                            |
| Lee-anne                          | Lynch      |                       | RN, RM, BHSc            | Sunshine Hospital, Western Health  | Melbourne, Victoria, Australia           | Site Research Personnel                                 |                                                                                            |
| Rosalynn                          | Pszczola   |                       | MBChB, MClInEpi         | Sunshine Hospital Western Health   | Melbourne, Victoria, Australia           | Site Research Personnel                                 |                                                                                            |
| Joanne                            | Said       |                       | PhD                     | Sunshine Hospital Western Health   | Melbourne, Victoria, Australia           | Site Research Personnel                                 |                                                                                            |
| Julianne                          | Shekleton  |                       | BBNSc (Hons), Dip Psych | Sunshine Hospital Western Health   | Melbourne, Victoria, Australia           | Site Research Personnel                                 |                                                                                            |
| Karina                            | Craine     |                       | MD                      | Tauranga Hospital                  | Tauranga, New Zealand                    | Site Research Personnel                                 |                                                                                            |
| Judy                              | Fergus     |                       | RM                      | Tauranga Hospital                  | Tauranga, New Zealand                    | Site Research Personnel                                 |                                                                                            |

## Supplemental Online Content: Nonauthor Collaborators

\*First name, last name, and suffix (if applicable) are required and will appear in PubMed.

| *First Name and Middle Initial(s) | *Last Name | *Suffix (eg, Jr, III) | Academic Degrees   | Institution             | Location (city, state/province, country) | Role or Contribution, eg, chair, principal investigator | Group (if more than 1 Group listed in the byline) and/or Subgroup (eg, Steering Committee) |
|-----------------------------------|------------|-----------------------|--------------------|-------------------------|------------------------------------------|---------------------------------------------------------|--------------------------------------------------------------------------------------------|
| Jo                                | Ford       |                       | NZRP               | Tauranga Hospital       | Tauranga, New Zealand                    | Site Research Personnel                                 |                                                                                            |
| Annette                           | Harris     |                       | RN, RM             | Tauranga Hospital       | Tauranga, New Zealand                    | Site Research Personnel                                 |                                                                                            |
| Megan                             | Kummer     |                       | NZROT              | Tauranga Hospital       | Tauranga, New Zealand                    | Site Research Personnel                                 |                                                                                            |
| Chris                             | Thurnell   |                       | MBChB              | Tauranga Hospital       | Tauranga, New Zealand                    | Site Research Personnel                                 |                                                                                            |
| Cherie                            | Boniface   |                       | RN, RM             | The Townsville Hospital | Townsville, Queensland, Australia        | Site Research Personnel                                 |                                                                                            |
| Audra                             | Davis      |                       | RN, CM, RM         | The Townsville Hospital | Townsville, Queensland, Australia        | Site Research Personnel                                 |                                                                                            |
| Corrinne                          | Dickinson  |                       | M Psych (Clinical) | The Townsville Hospital | Townsville, Queensland, Australia        | Site Research Personnel                                 |                                                                                            |
| Susan                             | Ireland    |                       | MBChB              | The Townsville Hospital | Townsville, Queensland, Australia        | Site Research Personnel                                 |                                                                                            |
| Annemarie                         | Lawrence   |                       | RM                 | The Townsville Hospital | Townsville, Queensland, Australia        | Site Research Personnel                                 |                                                                                            |
| Katie                             | Mandell    |                       | B Psych (Hons)     | The Townsville Hospital | Townsville, Queensland, Australia        | Site Research Personnel                                 |                                                                                            |
| Sheree                            | Menon      |                       | M Psych (Clinical) | The Townsville Hospital | Townsville, Queensland, Australia        | Site Research Personnel                                 |                                                                                            |
| David                             | Watson     |                       | MBBS, CMFM         | The Townsville Hospital | Townsville, Queensland, Australia        | Site Research Personnel                                 |                                                                                            |

## Supplemental Online Content: Nonauthor Collaborators

\*First name, last name, and suffix (if applicable) are required and will appear in PubMed.

| *First Name and Middle Initial(s) | *Last Name | *Suffix (eg, Jr, III) | Academic Degrees | Institution                 | Location (city, state/province, country) | Role or Contribution, eg, chair, principal investigator | Group (if more than 1 Group listed in the byline) and/or Subgroup (eg, Steering Committee) |
|-----------------------------------|------------|-----------------------|------------------|-----------------------------|------------------------------------------|---------------------------------------------------------|--------------------------------------------------------------------------------------------|
| Michelle                          | Bennett    |                       | DipOT            | Wellington Women's Hospital | Wellington, New Zealand                  | Site Research Personnel                                 |                                                                                            |
| Rose                              | Elder      |                       | MBChB            | Wellington Women's Hospital | Wellington, New Zealand                  | Site Research Personnel                                 |                                                                                            |
| Philippa                          | Hayne      |                       | RN, MN           | Wellington Women's Hospital | Wellington, New Zealand                  | Site Research Personnel                                 |                                                                                            |
| Lorna                             | Massov     |                       | RM, MPH          | Wellington Women's Hospital | Wellington, New Zealand                  | Site Research Personnel                                 |                                                                                            |
| Helen                             | Miller     |                       | MBChB            | Wellington Women's Hospital | Wellington, New Zealand                  | Site Research Personnel                                 |                                                                                            |
| Meghan E.                         | Sandler    |                       | MBChB            | Wellington Women's Hospital | Wellington, New Zealand                  | Site Research Personnel                                 |                                                                                            |
| Valerie                           | Schenk     |                       | MBBCh            | Wellington Women's Hospital | Wellington, New Zealand                  | Site Research Personnel                                 |                                                                                            |
| Natalie                           | Wilkes     |                       | BN               | Wellington Women's Hospital | Wellington, New Zealand                  | Site Research Personnel                                 |                                                                                            |
| Thabani                           | Sibanda    |                       | MBChB, MSc,      | Whakatane Hospital          | Whakatane, New Zealand                   | Site Research Personnel                                 |                                                                                            |
| Warren                            | Davis      |                       | MBBS             | Wollongong Hospital         | Wollongong, New South Wales, Australia   | Site Research Personnel                                 |                                                                                            |
| Natalie                           | Dill       |                       | RM               | Wollongong Hospital         | Wollongong, New South Wales, Australia   | Site Research Personnel                                 |                                                                                            |
| Nelson                            | Espinoza   |                       | MA               | Wollongong Hospital         | Wollongong, New South Wales, Australia   | Site Research Personnel                                 |                                                                                            |
| Ansar                             | Kunjunju   |                       | MD               | Wollongong Hospital         | Wollongong, New South Wales, Australia   | Site Research Personnel                                 |                                                                                            |

## Supplemental Online Content: Nonauthor Collaborators

\*First name, last name, and suffix (if applicable) are required and will appear in PubMed.

| *First Name and Middle Initial(s) | *Last Name   | *Suffix (eg, Jr, III) | Academic Degrees | Institution                   | Location (city, state/province, country) | Role or Contribution, eg, chair, principal investigator | Group (if more than 1 Group listed in the byline) and/or Subgroup (eg, Steering Committee) |
|-----------------------------------|--------------|-----------------------|------------------|-------------------------------|------------------------------------------|---------------------------------------------------------|--------------------------------------------------------------------------------------------|
| Ian                               | Wright       |                       | MBBS             | Wollongong Hospital           | Wollongong, New South Wales, Australia   | Site Research Personnel                                 |                                                                                            |
| Chad                              | Anderson     |                       | MBBS             | Women's & Children's Hospital | Adelaide, South Australia, Australia     | Site Research Personnel                                 |                                                                                            |
| Vincent                           | Ball         |                       | BA               | Women's & Children's Hospital | Adelaide, South Australia, Australia     | Data manager                                            |                                                                                            |
| Vineesh                           | Bhatia       |                       | MD               | Women's & Children's Hospital | Adelaide, South Australia, Australia     | Site Research Personnel                                 |                                                                                            |
| Rose                              | Burford-Rice |                       | MPsych           | Women's & Children's Hospital | Adelaide, South Australia, Australia     | Site Research Personnel                                 |                                                                                            |
| Daniela                           | Gagliardi    |                       | MPH              | Women's & Children's Hospital | Adelaide, South Australia, Australia     | Research coordinator                                    |                                                                                            |
| Michaela L.                       | Gooding      |                       | B Psych          | Women's & Children's Hospital | Adelaide, South Australia, Australia     | Follow up Research Coordinator                          |                                                                                            |
| Shanshan                          | Han          |                       | PhD              | Women's & Children's Hospital | Adelaide, South Australia, Australia     | Research coordinator                                    |                                                                                            |
| Bevan                             | Headley      |                       | MBBS             | Women's & Children's Hospital | Adelaide, South Australia, Australia     | Site Research Personnel                                 |                                                                                            |
| Caroline                          | Holst        |                       |                  | Women's & Children's Hospital | Adelaide, South Australia, Australia     | Research assistant                                      |                                                                                            |
| Amy                               | Keir         |                       | PhD              | Women's & Children's Hospital | Adelaide, South Australia, Australia     | Site Research Personnel                                 |                                                                                            |
| Tech Yee                          | Khong        |                       | MD               | Women's & Children's Hospital | Adelaide, South Australia, Australia     | Data Monitoring Committee member                        |                                                                                            |
| Anuradha                          | Kochar       |                       | MBBS             | Women's & Children's Hospital | Adelaide, South Australia, Australia     | Site Research Personnel                                 |                                                                                            |
| Yin Yee                           | Lai          |                       | MBBS             | Women's & Children's Hospital | Adelaide, South Australia, Australia     | Site Research Personnel                                 |                                                                                            |

## Supplemental Online Content: Nonauthor Collaborators

\*First name, last name, and suffix (if applicable) are required and will appear in PubMed.

| *First Name and Middle Initial(s) | *Last Name | *Suffix (eg, Jr, III) | Academic Degrees   | Institution                                           | Location (city, state/province, country) | Role or Contribution, eg, chair, principal investigator | Group (if more than 1 Group listed in the byline) and/or Subgroup (eg, Steering Committee) |
|-----------------------------------|------------|-----------------------|--------------------|-------------------------------------------------------|------------------------------------------|---------------------------------------------------------|--------------------------------------------------------------------------------------------|
| Mary                              | Paleologos |                       |                    | Women's & Children's Hospital                         | Adelaide, South Australia, Australia     | Research assistant                                      |                                                                                            |
| Jeffrey                           | Robinson   |                       | MB, BS             | Women's & Children's Hospital, University of Adelaide | Adelaide, South Australia, Australia     | Data Monitoring Committee member                        |                                                                                            |
| Kaye                              | Robinson   |                       |                    | Women's & Children's Hospital                         | Adelaide, South Australia, Australia     | Research assistant                                      |                                                                                            |
| Michael                           | Stark      |                       | PhD                | Women's & Children's Hospital                         | Adelaide, South Australia, Australia     | Site Research Personnel                                 |                                                                                            |
| Elise                             | Thompson   |                       | M Psych (Clinical) | Women's & Children's Hospital                         | Adelaide, South Australia, Australia     | Site Research Personnel                                 |                                                                                            |
| Miranda                           | Willet     |                       | M Psych (Clinical) | Women's & Children's Hospital                         | Adelaide, South Australia, Australia     | Site Research Personnel                                 |                                                                                            |
| Yu                                | Zhang      |                       | BICT               | Women's & Children's Hospital                         | Adelaide, South Australia, Australia     | Data manager                                            |                                                                                            |
