# Supplementary material
Source: PubMed Central journal article supplement (PMC10427942)
Supplement: jama-e2312357-s005.pdf [file jama-e2312357-s005.pdf]

## Data Sharing Statement

Crowther. Prenatal Intravenous Magnesium at 30-34 Weeks' Gestation and Neurodevelopmental Outcomes in Offspring. *JAMA*. Published August 15, 2023. doi:10.1001/jama.2023.12357

### Data

**Data available:** Yes

**Data types:** Deidentified participant data, Data dictionary

**How to access data:** Maternal and Perinatal Research Hub at the Liggins Institute, University of Auckland; email [researchhub@auckland.ac.nz](mailto:researchhub@auckland.ac.nz).

**When available:** beginning date: 01-15-2024

### Supporting Documents

**Document types:** None

### Additional Information

**Who can access the data:** Researchers who provide a methodologically sound proposal and have appropriate ethical approval, where necessary, to achieve the research aims in the approved proposal.

**Types of analyses:** Researchers who provide a methodologically sound proposal and have appropriate ethical approval, where necessary, to achieve the research aims in the approved proposal.

**Mechanisms of data availability:** With a signed Data Access Agreement that includes a commitment to using the data only for the specified proposal, not to attempt to identify any individual participant, a commitment to secure storage and use of the data, and to destroy or return the data after completion of the project.

**Any additional restrictions:** The Liggins Institute, University of Auckland reserves the right to charge a fee to cover the costs of making data available, if needed, for data requests that require additional work to prepare.
